# Supplementary material
Source: PubMed Central journal article supplement (PMC6413524)
Supplement: NIHMS1001033-supplement-esi.pdf [file NIHMS1001033-supplement-esi.pdf]

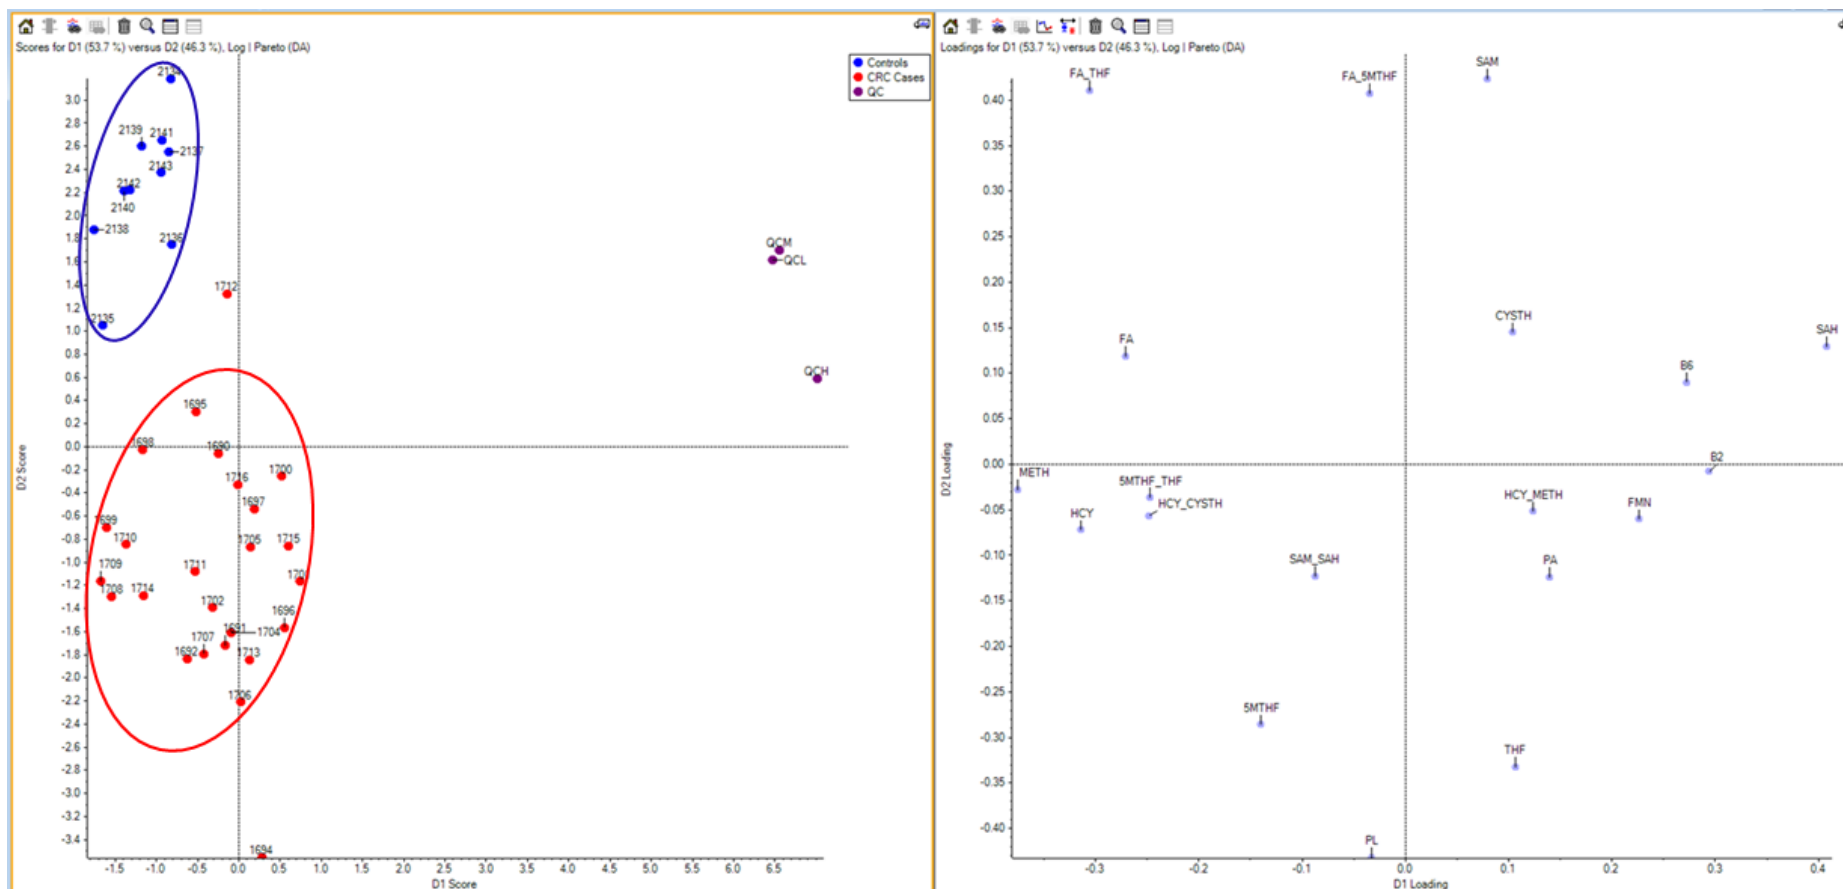

**Supplementary Figure 1:** PCA-DA plots showing the clustering the CRC cases (red) from the Controls (blue) alongside the quality control samples low (QCL), medium (QCM) and high (QCH) using targeted scan. The left pane shows the loadings of the plasma samples while the right shows the loadings of the metabolites.
